# Supplementary material
Source: Springer Nature journal article supplement (https://www.springermedizin.de/resource/supplementary/13024_2010_167_MOESM1_ESM.pdf/9643568)
Supplement: MOESM1 [file 9643568]

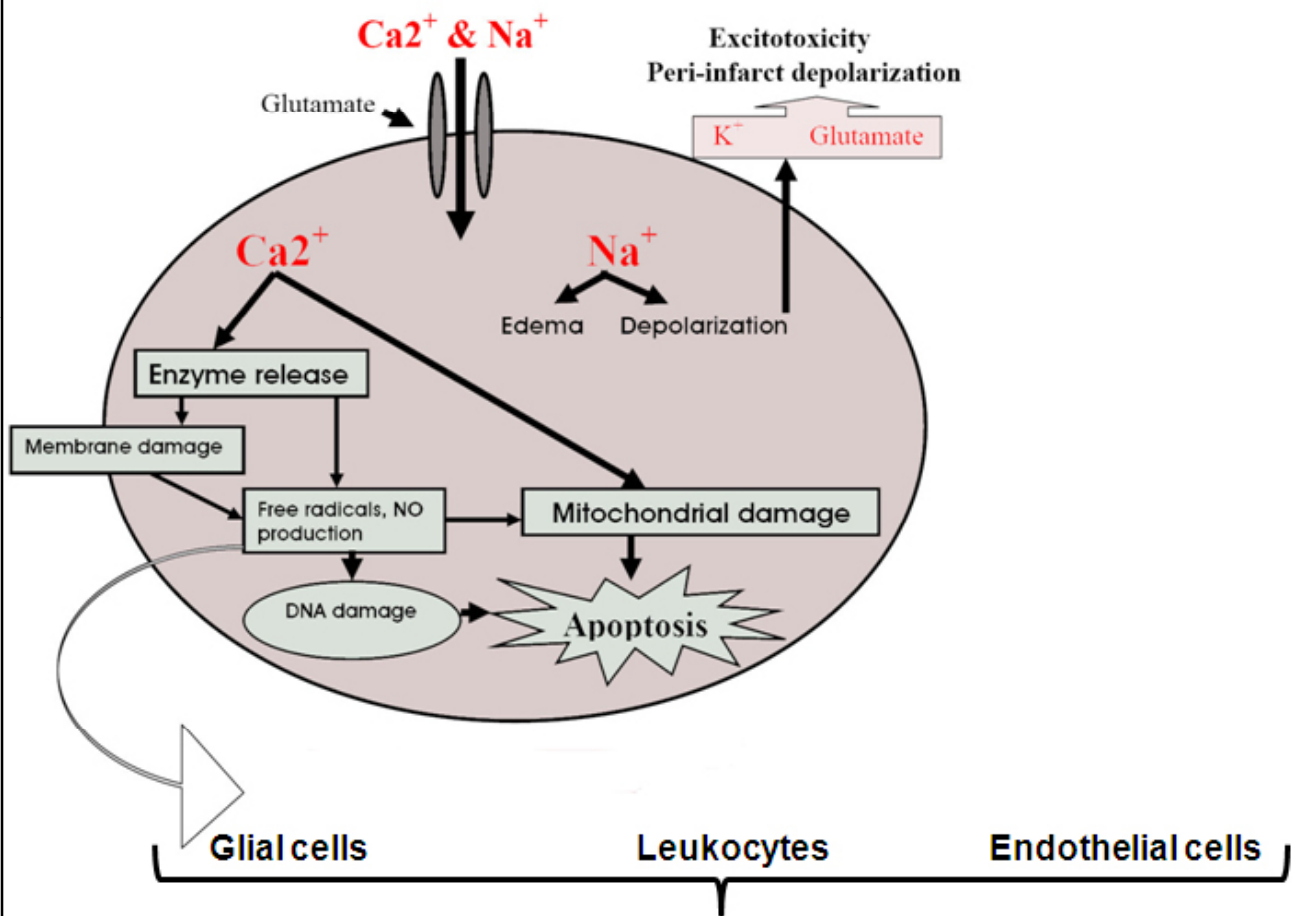

### JNK / P-38 / NF $\kappa$ B / AP-1

- Proinflammatory cytokine
- Complement activation
- Chemokines production
- Free radical production
- Lipid peroxidation
- Glial cell activation

- Proinflammatory cytokine
- Chemokines production
- Complement activation
- Free radical production
- Leukocyte adhesion
- Leukocyte activation

- Proinflammatory cytokine
- Chemokines production
- Complement activation
- Adhesion molecules
- Free radical production
- BBB dysfunction
